# Supplementary material
Source: MDPI journal article supplement (https://www.mdpi.com/1424-8247/15/6/691)
Supplement: s1 [file s1]

SUPPLEMENTARY FILES

**Table S1.** IUPAC names and structures of the compounds (25)

| Name | IUPAC Name                                                                                                                                                                                                                                                                                                                                                                                                                                                                                                                                                                                                                                                                         |
|------|------------------------------------------------------------------------------------------------------------------------------------------------------------------------------------------------------------------------------------------------------------------------------------------------------------------------------------------------------------------------------------------------------------------------------------------------------------------------------------------------------------------------------------------------------------------------------------------------------------------------------------------------------------------------------------|
| 1    | (2R)-2-[[[(2S)-2-[[[(2R)-2-[[[(2S)-2-[[[(2R)-2-[[[(2S)-2-amino-6-[6-[[[(2S)-2-[[[(2S)-2-[[2-[[[(2S)-2,6-diaminohexanoyl] amino]acetyl]amino]-3-(4-hydroxyphenyl)propanoyl]amino]-3-(4-hydroxyphenyl)propanoyl] amino]hexanoylamino]hexanoyl]amino]propanoyl]amino]-6-[6-[[[(2S)-2-[[[(2S)-2-[[2-[[[(2S)-2,6-diaminohexanoyl] amino]acetyl]amino]-3-(4-hydroxyphenyl)propanoyl] amino]-3-(4 -hydroxyphenyl) propanoyl] amino] hexanoylamino] hexanoyl] amino]propanoyl]amino]-6-[6-[[[(2S)-2-[[[(2S)-2-[[2-[[[(2S)-2,6-diaminohexanoyl]amino]acetyl]amino]-3-(4-hydroxyphenyl) propanoyl]amino]-3-(4-hydroxyphenyl) propanoyl]amino] hexanoylamino] hexanoyl] amino] propanoic acid |
|      | 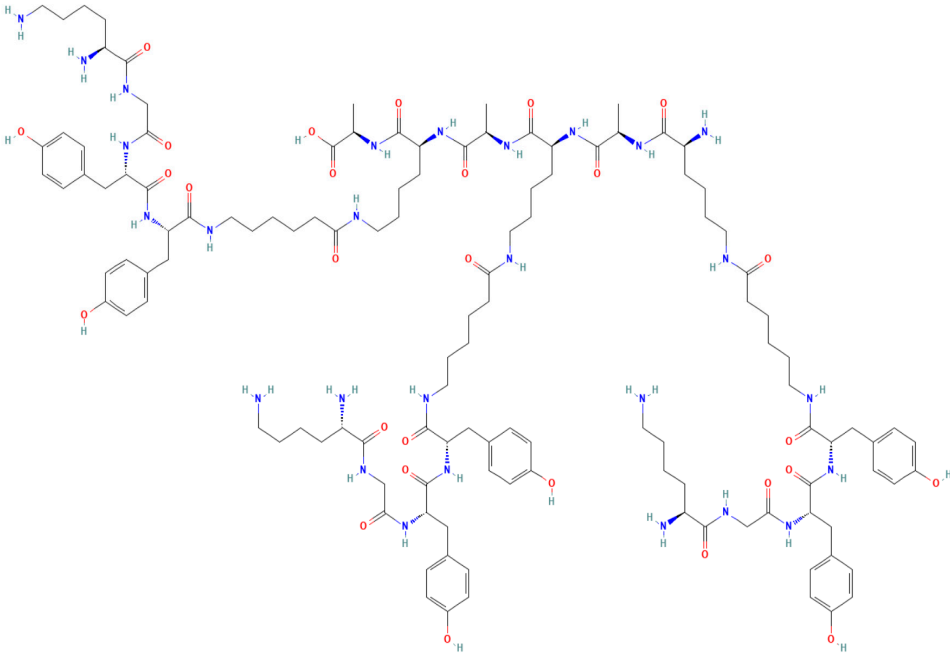                                                                                                                                                                                                                                                                                                                                                                                                                                                                                                                                                                                                |
| 2    | (2S)-2-[2-[2-[2-[2-[2-[2-[2-[2-[[[(1S)-1-carboxy-2-[[4-[2-(1,4,5,6-tetrahydropyrimidin-2-ylamino)ethoxy]benzoyl]amino]ethyl]sulfamoyl]ethylcarbamoylethoxy]ethoxy]ethoxy]ethoxy]ethoxy]ethoxy]ethoxycarbonylamino]ethylsulfonfylamino]-3-[[4-[2-(1,4,5,6-tetrahydropyrimidin-2-ylamino)ethoxy]benzoyl]amino]propanoic acid                                                                                                                                                                                                                                                                                                                                                         |
|      |                                                                                                                                                                                                                                                                                                                                                                                                                                                                                                                                                                                                |

## SUPPLEMENTARY FILES

3

N[C@@H](CC(C)[C@H]([C@@H](NC(=O)CCCn1cnc(c1)N)C(=O)NCC)C(=O)NCC)C(=O)NCC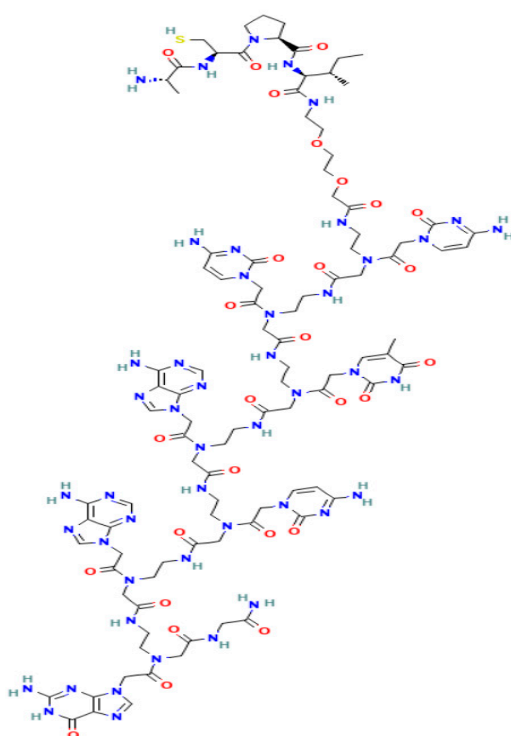

# SUPPLEMENTARY FILES

- 4 (2S)-6-amino-2-[[[(2S)-1-[(2S)-2-[[[(2S)-2-[[2-[[[(2S)-2-[(2-aminoacetyl)amino]-5-(diaminomethylideneamino)pentanoyl]amino]acetyl]amino]-3-carboxypropanoyl]amino]-3-hydroxypropanoyl]pyrrolidine-2-carbonyl]amino]hexanoic acid

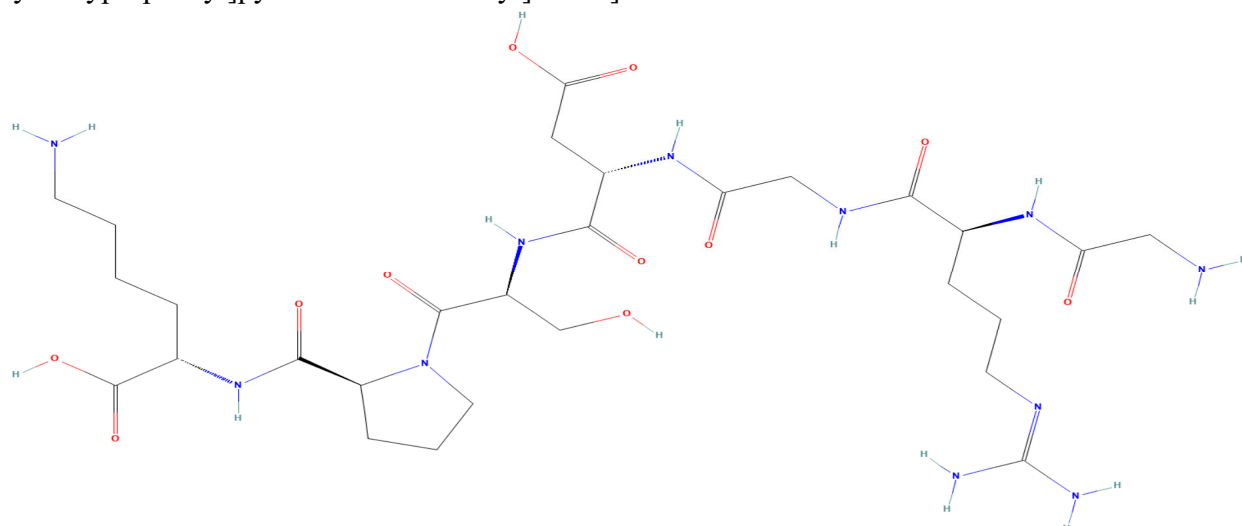

- 5 (2S)-3-[4-[(2,6-dichlorobenzoyl)amino]phenyl]-2-[[1-[[4-(1-methyltetrazol-5-yl)phenyl]methyl]cyclobutanecarbonyl] amino]propanoic acid

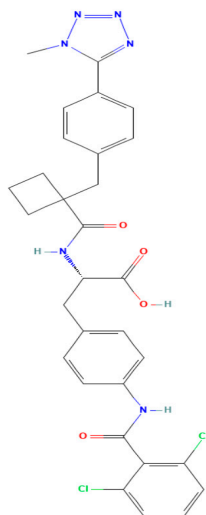

# SUPPLEMENTARY FILES

- 6 (3S)-3-(4-methoxyphenyl)-3-[[2-[3-methoxypropyl-[2-[4-[(2-methylphenyl)carbamoylamino] phenyl] acetyl] amino]acetyl] amino]propanoic acid

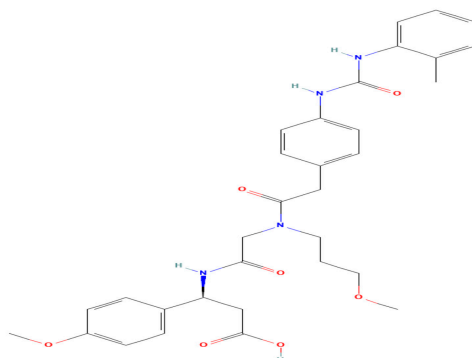

# SUPPLEMENTARY FILES

**Table S2:** ADMET parameters for the selected compounds.

| Parameters                    | Units                                       | Compounds |        |        |       |       |       |
|-------------------------------|---------------------------------------------|-----------|--------|--------|-------|-------|-------|
|                               |                                             | 1         | 2      | 3      | 4     | 5     | 6     |
| Molecular Weights             | Dalton                                      | 2490.0    | 1335.5 | 2465.5 | 715.8 | 607.5 | 590.7 |
| Water solubility              | Numeric (log mol/L)                         | 1.0       | 2.0    | 3.0    | 4.0   | 5.0   | 6.0   |
| Caco2 permeability            | Numeric (log Papp in 10 <sup>-6</sup> cm/s) | -2.9      | -2.9   | -2.9   | -2.9  | -3.0  | -3.4  |
| Intestinal absorption (human) | Numeric (% Absorbed)                        | -2.2      | -0.3   | -1.8   | -0.9  | -0.1  | 0.0   |
| Skin Permeability             | Numeric (log Kp)                            | 0.0       | 0.0    | 0.0    | 0.0   | 58.4  | 55.3  |
| P-glycoprotein substrate      | Categorical (Yes/No)                        | -2.7      | -2.7   | -2.7   | -2.7  | -2.7  | -2.7  |
| P-glycoprotein I inhibitor    | Categorical (Yes/No)                        | Yes       | Yes    | Yes    | Yes   | No    | Yes   |
| P-glycoprotein II inhibitor   | Categorical (Yes/No)                        | No        | No     | No     | No    | No    | No    |
| VDss (human)                  | Numeric (log L/kg)                          | No        | No     | No     | No    | Yes   | No    |
| Fraction unbound (human)      | Numeric (Fu)                                | 0.0       | -0.3   | 0.0    | -1.6  | -1.6  | -0.3  |
| BBB permeability              | Numeric (log BB)                            | 0.4       | 0.4    | 0.4    | 0.7   | 0.2   | 0.0   |
| CNS permeability              | Numeric (log PS)                            | -6.2      | -4.6   | -7.4   | -2.3  | -1.5  | -1.5  |
| CYP2D6 substrate              | Categorical (Yes/No)                        | -9.9      | -7.8   | -9.5   | -6.6  | -3.0  | -3.4  |
| CYP3A4 substrate              | Categorical (Yes/No)                        | No        | No     | No     | No    | No    | No    |
| CYP1A2 inhibitor              | Categorical (Yes/No)                        | No        | No     | No     | No    | Yes   | Yes   |

## SUPPLEMENTARY FILES

|                                   |                            |      |     |      |     |      |     |
|-----------------------------------|----------------------------|------|-----|------|-----|------|-----|
| CYP2C19 inhibitor                 | Categorical (Yes/No)       | No   | No  | No   | No  | No   | No  |
| CYP2C9 inhibitor                  | Categorical (Yes/No)       | No   | No  | No   | No  | No   | No  |
| CYP2D6 inhibitor                  | Categorical (Yes/No)       | No   | No  | No   | No  | Yes  | Yes |
| CYP3A4 inhibitor                  | Categorical (Yes/No)       | No   | No  | No   | No  | No   | No  |
| Total Clearance                   | Numeric (log ml/min/kg)    | No   | No  | No   | No  | No   | No  |
| Renal OCT2 substrate              | Categorical (Yes/No)       | 1.1  | 0.8 | 0.2  | 0.3 | -0.2 | 0.3 |
| AMES toxicity                     | Categorical (Yes/No)       | No   | No  | No   | No  | No   | No  |
| Max. tolerated dose (human)       | Numeric (log mg/kg/day)    | No   | No  | Yes  | No  | No   | No  |
| hERG I inhibitor                  | Categorical (Yes/No)       | 0.4  | 0.4 | 0.4  | 0.5 | 0.5  | 0.6 |
| hERG II inhibitor                 | Categorical (Yes/No)       | No   | No  | No   | No  | No   | No  |
| Oral Rat Acute Toxicity (LD50)    | Numeric (mol/kg)           | Yes  | No  | Yes  | No  | Yes  | No  |
| Oral Rat Chronic Toxicity (LOAEL) | Numeric (log mg/kg_bw/day) | 2.5  | 2.5 | 2.5  | 2.5 | 2.7  | 2.9 |
| Hepatotoxicity                    | Categorical (Yes/No)       | 11.2 | 3.2 | -1.0 | 3.0 | 2.7  | 1.8 |
| Skin Sensitisation                | Categorical (Yes/No)       | Yes  | Yes | No   | No  | Yes  | Yes |
| <i>T. pyriformis</i> toxicity     | Numeric (log ug/L)         | No   | No  | No   | No  | No   | No  |
| Minnow toxicity                   | Numeric (log mM)           | 0.3  | 0.3 | 0.3  | 0.3 | 0.3  | 0.3 |

---
